# Supplementary material
Source: publisher figshare collection journal article supplement (https://springernature.figshare.com/ndownloader/files/13784681)
Supplement: Supplementary file [file 13784681]

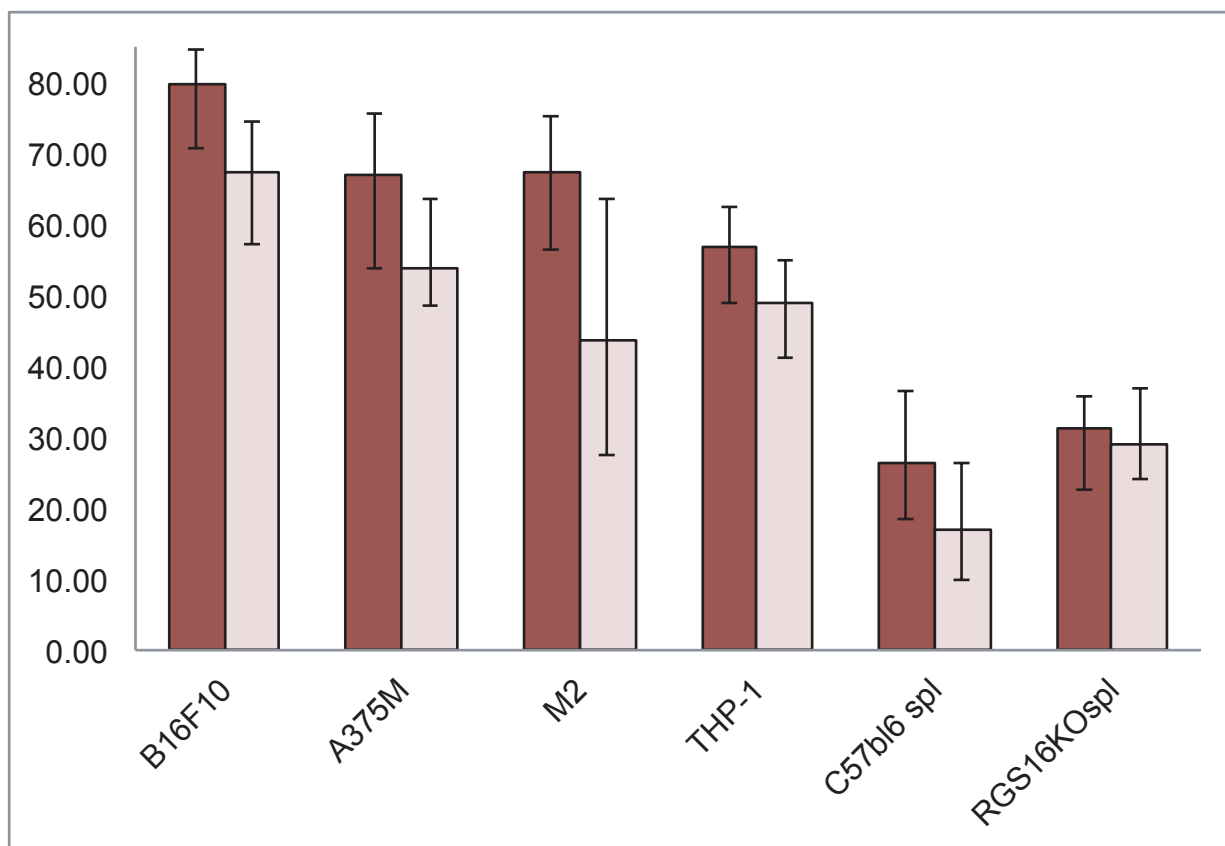

### Supplementary Figure 1

Forty eight hours post-transfection with a GFP expressing plasmid, cells were detached with 0.05% trypsin and the fluorescence analysed using a BD FACSCalibur flow cytometer. Thirty thousand events were acquired. Transfection efficacy was estimated by the quantification of the proportion of GFP-positive cells in the sample, as shown for each cell line transfected using lipofectamin (brown bars) or PEI (pink bars).
